# Supplementary material for: Luminal MCF-12A & myoepithelial-like Hs 578Bst cells form bilayered acini similar to human breast
Source: PubMed Central journal article supplement (PMC6088263; doi:10.4155/fsoa-2018-0010), 2018-06-28
Supplement: fsoa-04-314-s1.pdf [file fsoa-04-314-s1.pdf]

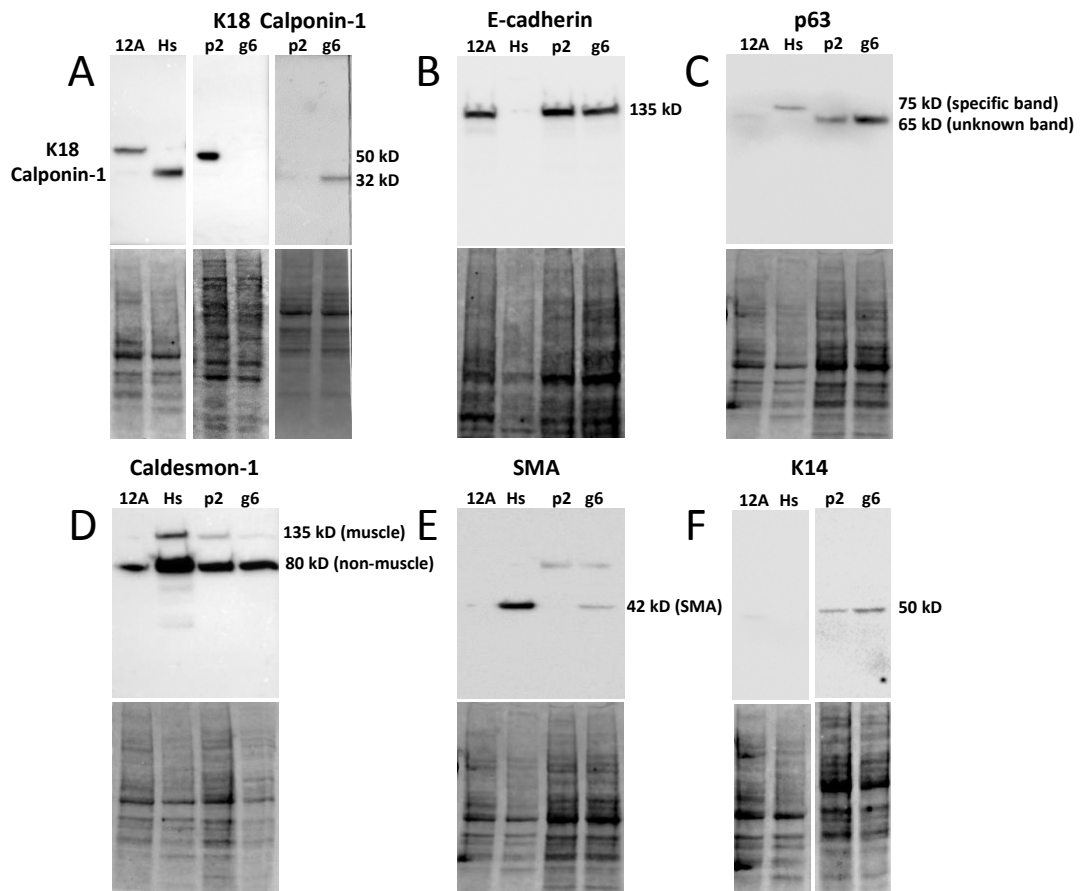

**Supplementary figure 1. Human luminal epithelial MCF-12A and myoepithelial-like Hs 578Bst cells have more differentiated phenotypes than murine luminal epithelial SCp2 and myoepithelial SCg6 cells.** MCF-12A, Hs 578Bst, SCp2 and SCg6 cells were cultured in 2D. Western blot analysis were performed using antibodies against (A) cytokeratin 18 (K-18) and (B) E-cadherin luminal markers, as well as (A) calponin-1, (C) p63, (D) caldesmon-1, (E) SMA and (F) Cytokeratin 14 (K14) myoepithelial markers, respectively. Note that blot A, left panel, represents the same membrane sequentially probed with K18 and calponin-1. Similarly, blots C and D represent the same membrane sequentially probed with p63 and SMA. For all blots, bottom panels show total lane proteins.
