# Supplementary material for: Luminal MCF-12A & myoepithelial-like Hs 578Bst cells form bilayered acini similar to human breast
Source: PubMed Central journal article supplement (PMC6088263; doi:10.4155/fsoa-2018-0010), 2018-06-28
Supplement: fsoa-04-314-s2.pdf [file fsoa-04-314-s2.pdf]

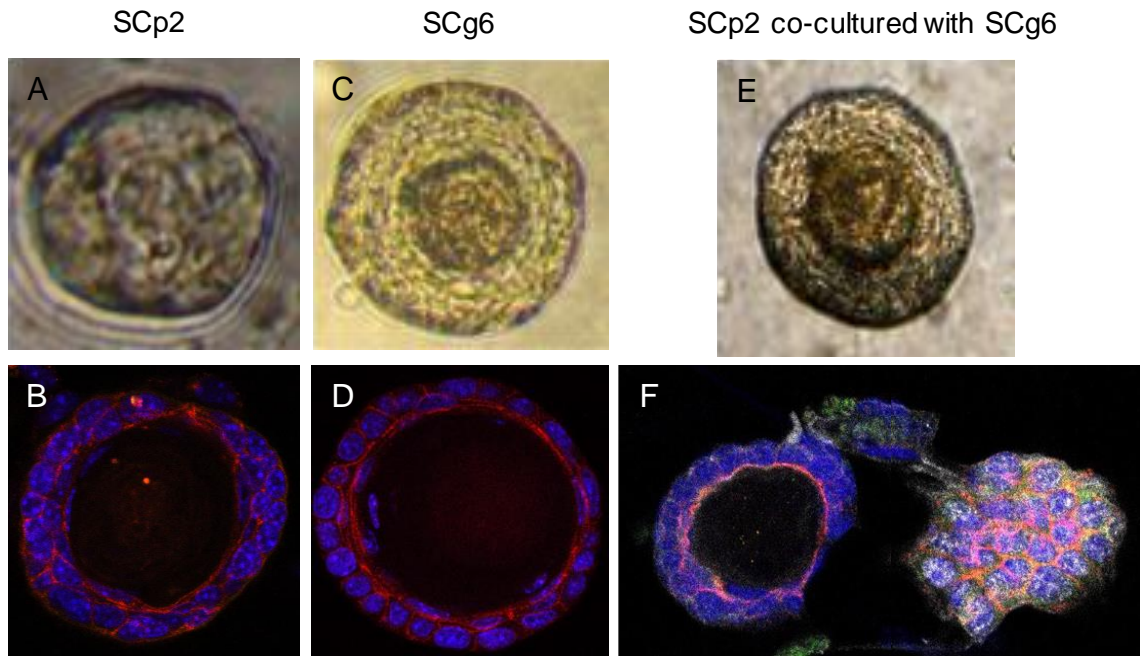

**Figure supplementary 2. Co-cultures SCp2 and SCg6 cells did not form bilayered acini in Matrigel.** (A, C, E) Representative single optical microscopy images of SCp2 cells (A), SCg6 cells (B) and SCp2 cells co-cultured with SCg6 cells (E) embedded in Matrigel. (B, D, F) Cells were immunolabeled with E-cadherin (red) and SMA (white). Nuclei are stained with DAPI (blue). SCg6 cells formed spheroids structures with lumen (C, D), similar to SCp2 (A, B). When SCp2 were co-cultured with SCg6 (E, F), some spheroids had a lumen while other did not. SMA was present only on structures without lumen (F). SCp2 and SCg6 cells did not form bilayered spheroid with a lumen in co-culture.
